# Supplementary material for: scNMT-seq enables joint profiling of chromatin accessibility DNA methylation and transcription in single cells
Source: PubMed Central journal article supplement (PMC5823944; doi:10.1038/s41467-018-03149-4), 2018-02-22
Supplement: 41467_2018_3149_MOESM3_ESM.pdf [file 41467_2018_3149_MOESM3_ESM.pdf]

## **Description of Additional Supplementary Files**

File Name: Supplementary Data 1

Description: Sequencing quality metrics for scBS-seq and scRNA-seq libraries.

File Name: Supplementary Data 2

Description: Summary statistics obtained for the cell-specific association analysis correlating methylation with expression, accessibility with expression or methylation with accessibility at individual loci.

File Name: Supplementary Data 3

Description: Genomic annotations used in this study.
